# Supplementary material
Source: PubMed Central journal article supplement (PMC2995354)
Supplement: blood-2010-03-275438_1.pdf [file blood-2010-03-275438_1.pdf]

**Table S1. Combinations of fluorochrome-conjugated antibodies used in panels for this study**

| <i>Fluorochrome</i>       | <i>T-cell differentiation</i> | <i>T-cell activation</i> | <i>DC / B / Mono</i> | <i>NK-cells</i> | <i>Tregs</i> | <i>T function</i> | <i>NK function</i> |
|---------------------------|-------------------------------|--------------------------|----------------------|-----------------|--------------|-------------------|--------------------|
| <b>Cy55PerCP</b>          |                               |                          | CD3                  | CD3             |              |                   |                    |
| <b>FITC</b>               | CD45RA                        | Ki-67                    | CD16                 | CD16            | Ki-67        |                   | IFN- $\gamma$      |
| <b>CY7 APC</b>            | CD3                           | CD3                      | CD20                 | CD20            | CD3          | CD3               | CD3                |
| <b>Alexa 680</b>          | CD27                          | CD38                     | CD27                 | CD8b            |              | CCR7              | MIP-1 $\beta$      |
| <b>APC</b>                | CD95                          | CCR5                     | CD11c                |                 |              | CD95              |                    |
| <b>Qdot 800</b>           | CD8                           | CD8                      | CD8                  | CD8             | CD8          | CD8               |                    |
| <b>Qdot 655</b>           | CD4                           | CD122                    | CD14                 | CD122           |              | CD45RA            | CD8                |
| <b>Qdot 605</b>           | CD28                          | CD4                      | CD4                  | CD4             | CD4          |                   |                    |
| <b>Qdot 545</b>           |                               | HLA-DR                   | HLA-DR               |                 |              | CD4               |                    |
| <b>ViViD Pacific Blue</b> | ViViD +CD14                   | ViViD +CD14              | ViViD +CD16          | ViViD +CD14     | ViViD +CD14  | ViViD +CD14       | ViViD +CD14        |
| <b>CY7 PE</b>             |                               | CD25                     | CD86                 |                 | CD25         | TNF- $\alpha$     | TNF- $\alpha$      |
| <b>Alexa 700-PE</b>       |                               |                          |                      |                 |              |                   | CD20               |
| <b>CY5 PE</b>             |                               | CD95                     | CD80                 | CD56            | FoxP3        | CD28              | CD16               |
| <b>Alexa 594</b>          | CCR7                          | CCR7                     |                      |                 |              | IFN- $\gamma$     | CD56               |
| <b>PE</b>                 | CD127                         | CD132                    | IL-15Ra              | CD132           | CD127        | IL-2              | NKG2D              |

**Figure S1. Representative example of CD132 and CD122 expression in different subsets of NK- and T cells at the steady state.** NK-cells were defined as depicted in Fig. 2A;  $T_N$ ,  $T_{CM}$  and  $T_{EM}$  cells on the basis of CCR7 and CD95 expression, as in Fig. 3A.

**Figure S2. Effect of IL-15 on the quality of T- and NK-cell functional responses**  
(A) Frequency of responding CD4<sup>+</sup> and CD8<sup>+</sup> T cells after overnight polyclonal stimulation, as revealed by the production of IL-2, IFN-g and TNF-a production. (B) Bar charts of the quality of the CD4<sup>+</sup> and CD8<sup>+</sup> T-cell response after Boolean gating of cells producing IL-2, IFN-g or TNF-a. (C) Frequency of responding NK-cell subsets after overnight polyclonal stimulation, as revealed by the analysis of MIP-1b, IFN-g and TNF-a production. (D–E) Bar and pie charts of the quality of the cytokine-response in CD56-CD16<sup>-</sup> (D) and CD56-CD16<sup>+</sup> (E) NK cells after Boolean gating of cells producing MIP-1b, IFN-g or TNF-a. \*, P<0.05 after Wilcoxon rank test vs. d-7. 2: IL-2; g: IFN-g; T: TNF-a, M: MIP-1b.

**Figure S3. IL-15 expands natural occurring regulatory T (Tregs) cells but does not lead to their long-lasting accumulation.** (A) Gating strategy for the identification of Tregs: CD4<sup>+</sup> T cells were identified as in Fig. 2C, Tregs were further defined as CD25<sup>+</sup>, FoxP3<sup>+</sup> and CD127<sup>-</sup>. The fraction of proliferating, Ki-67<sup>+</sup> Tregs was subsequently determined. CD127 and Ki-67 expression in Tregs (red dots) are overlaid to conventional CD4<sup>+</sup> cells (black contour) for comparison. (B) Dynamics of Treg and Ki-67<sup>+</sup> Treg expansion in IL-15-treated animals. (C) Frequency of Tregs and Ki-67<sup>+</sup> Tregs in multiple tissues at d13 and d48 after the first IL-15 injection. Data were expressed as in Fig. 3B. Tissue abbreviations were reported as indicated in Materials and methods. \*, P<0.05 after Wilcoxon rank test vs. d-7 (B) or vs. sham (C).

**Figure S4. IL-15 administration alters the homeostasis of DC subsets. a) Gating strategy used for the identification of DC subsets.** DCs were defined as those cells not expressing CD16, CD14, CD3, CD20 but positive for HLA-DR. Plasmacytoid DC (pDCs) selectively express CD123 while myeloid DC (mDCs) CD11c. Levels of CD80, CD86 and IL-15Ra were shown in both subsets (indicated in red for pDCs and in blue for mDCs). Monocytes were defined as CD14<sup>+</sup> and levels of IL-15Ra expression in these cells is also shown. (B) The relative change in the absolute counts of circulating pDCs and mDCs upon IL-15 treatment is shown. Counts were obtained and indicated as described in Fig. 1. \*, P<0.05 for Wilcoxon rank test in IL-15-treated vs. sham. (C) Representative example of the frequency of NKT cells (defined as PBS57/CD1d-tetramer<sup>+</sup> Va24<sup>+</sup>) in the peripheral blood of a RM treated with 10 mg/Kg IL-15. Live CD3<sup>+</sup> CD14<sup>-</sup> CD20<sup>-</sup> are shown.

**Figure S5. Little activation of T<sub>N</sub> cells in response to IL-15 treatment.** Ki-67 (percentage of cells) and CD122 (MFI values) expression in T<sub>N</sub> as found in multiple tissues at d13 after IL-15 administration. T<sub>N</sub> were defined as those expressing CCR7 but not CD95. Data were expressed as indicated in Fig. 3B.

**Figure S6. Proliferation and activation of T cell is normalized at d48 after initiation of IL-15 treatment.** Frequency of T<sub>CM</sub> (CCR7<sup>+</sup>CD95<sup>+</sup>) and T<sub>EM</sub> (CCR7<sup>-</sup>CD95<sup>+</sup>) T-cells expressing Ki-67 and CD25 (CD4<sup>+</sup>) or Ki-67 and CD38 (CD8<sup>+</sup>) in different tissues of the body at d48 after IL-15 treatment initiation. Expression of CD122 (MFI) was also shown in the same cell subsets. Data were expressed as in Fig. 3B. Tissue abbreviations were reported as indicated in Materials and methods.

**Figure S7.** Spontaneous annexin V (anxV) expression on naïve, T<sub>CM</sub> and T<sub>EM</sub> cells after 24 hours culture. T-cell differentiation state was determined as in Fig. S5.

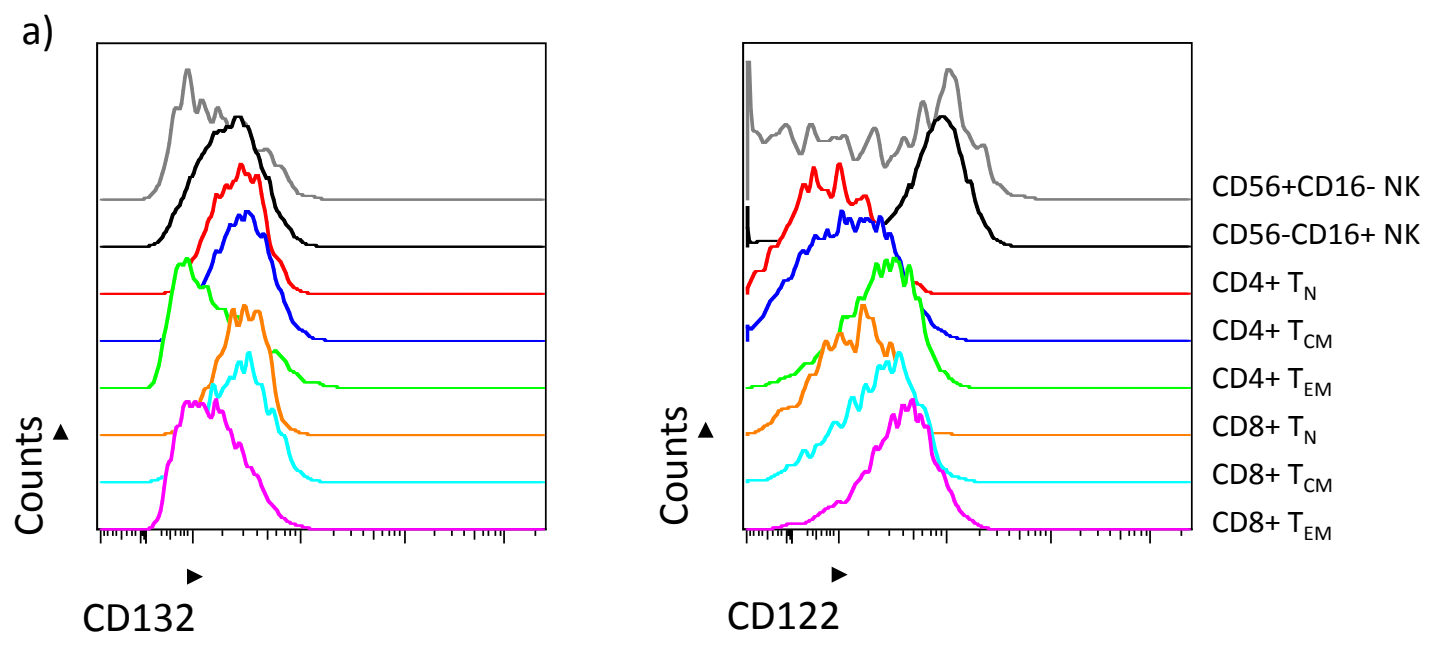

Figure S1

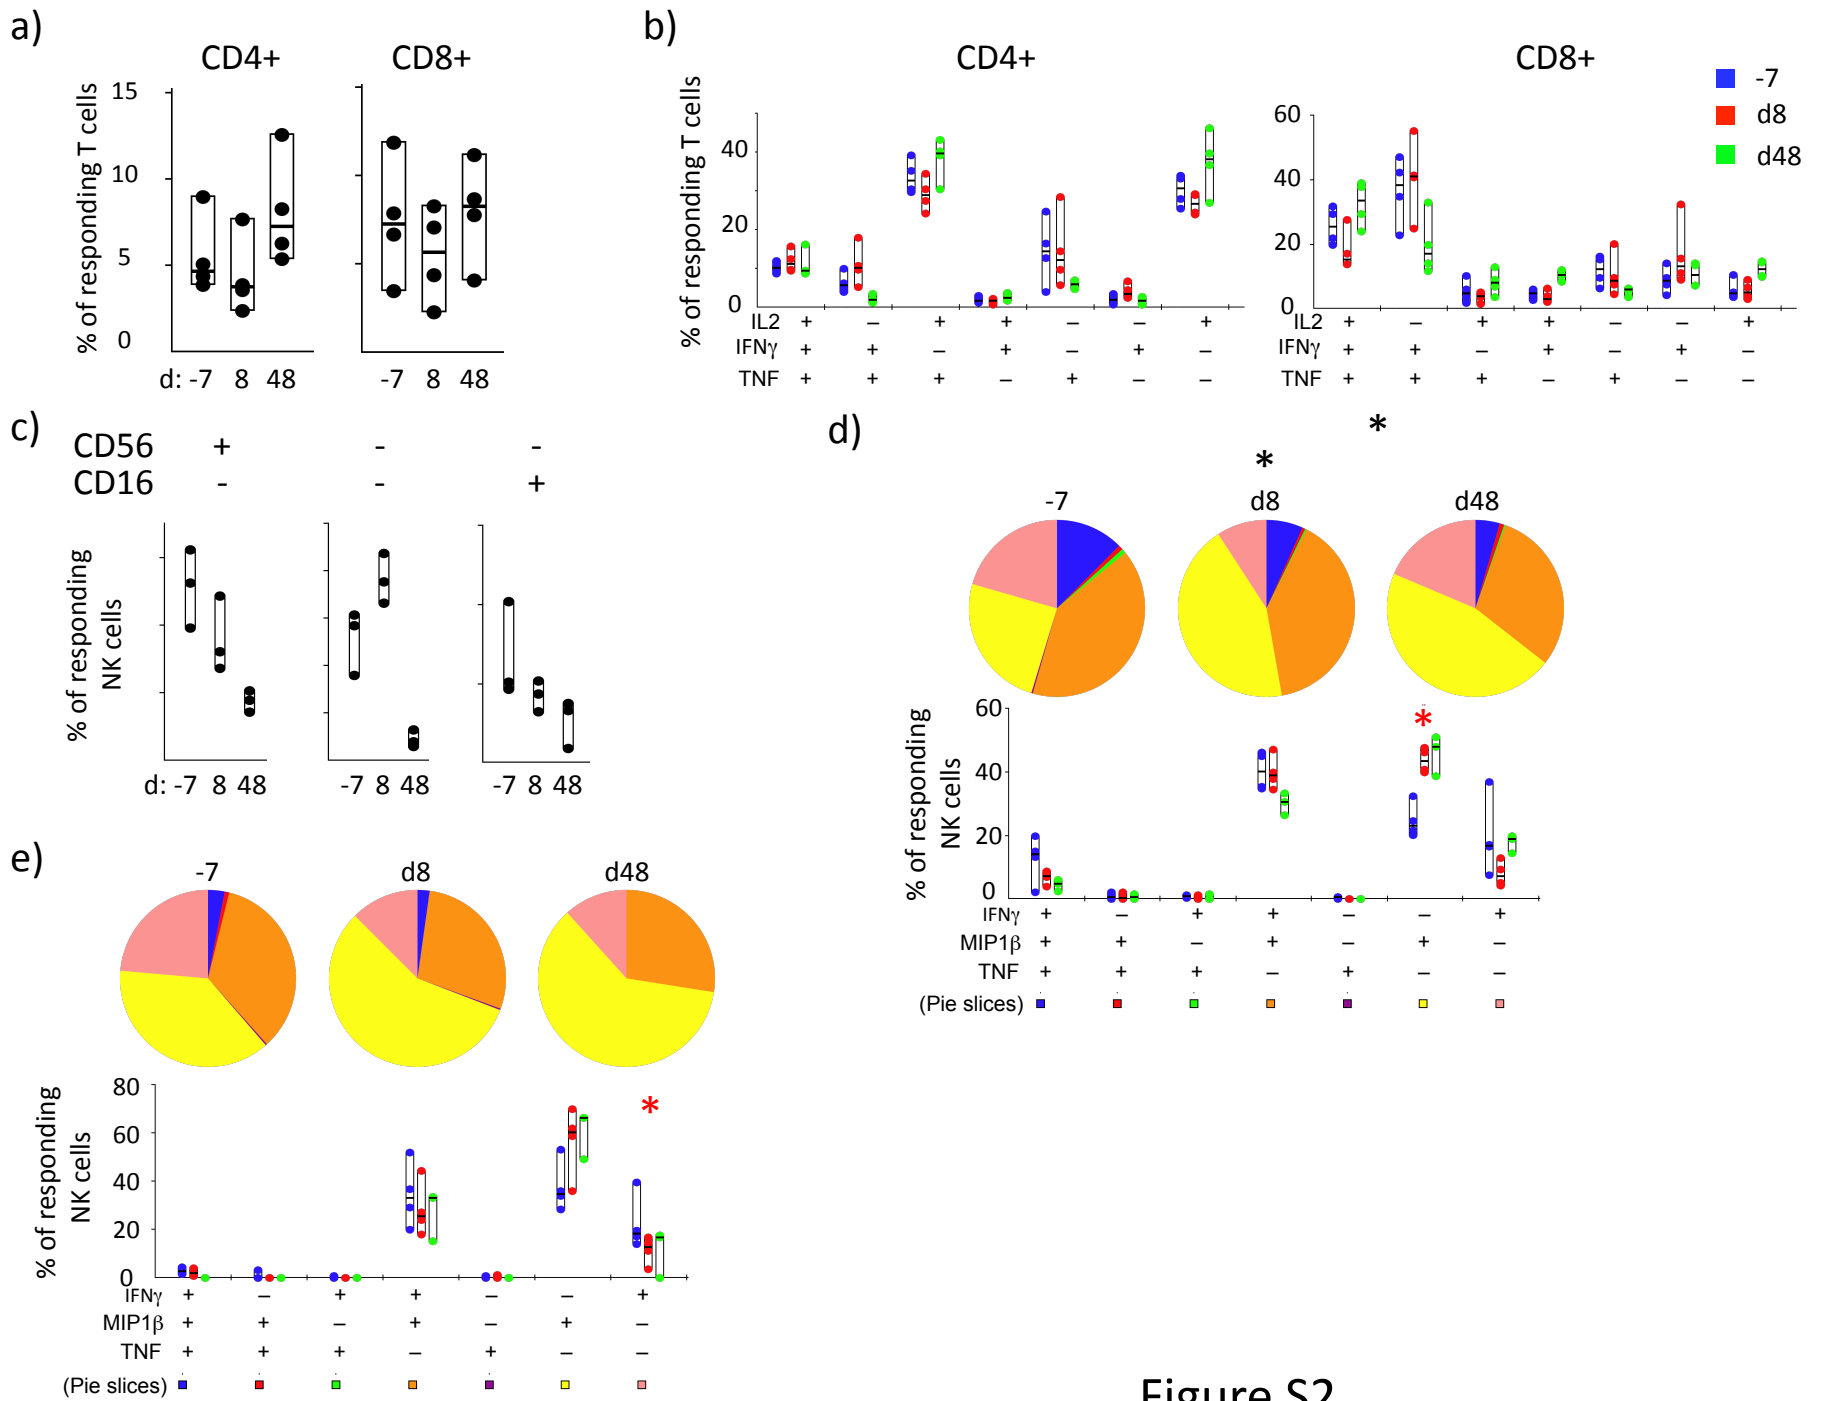

Figure S2

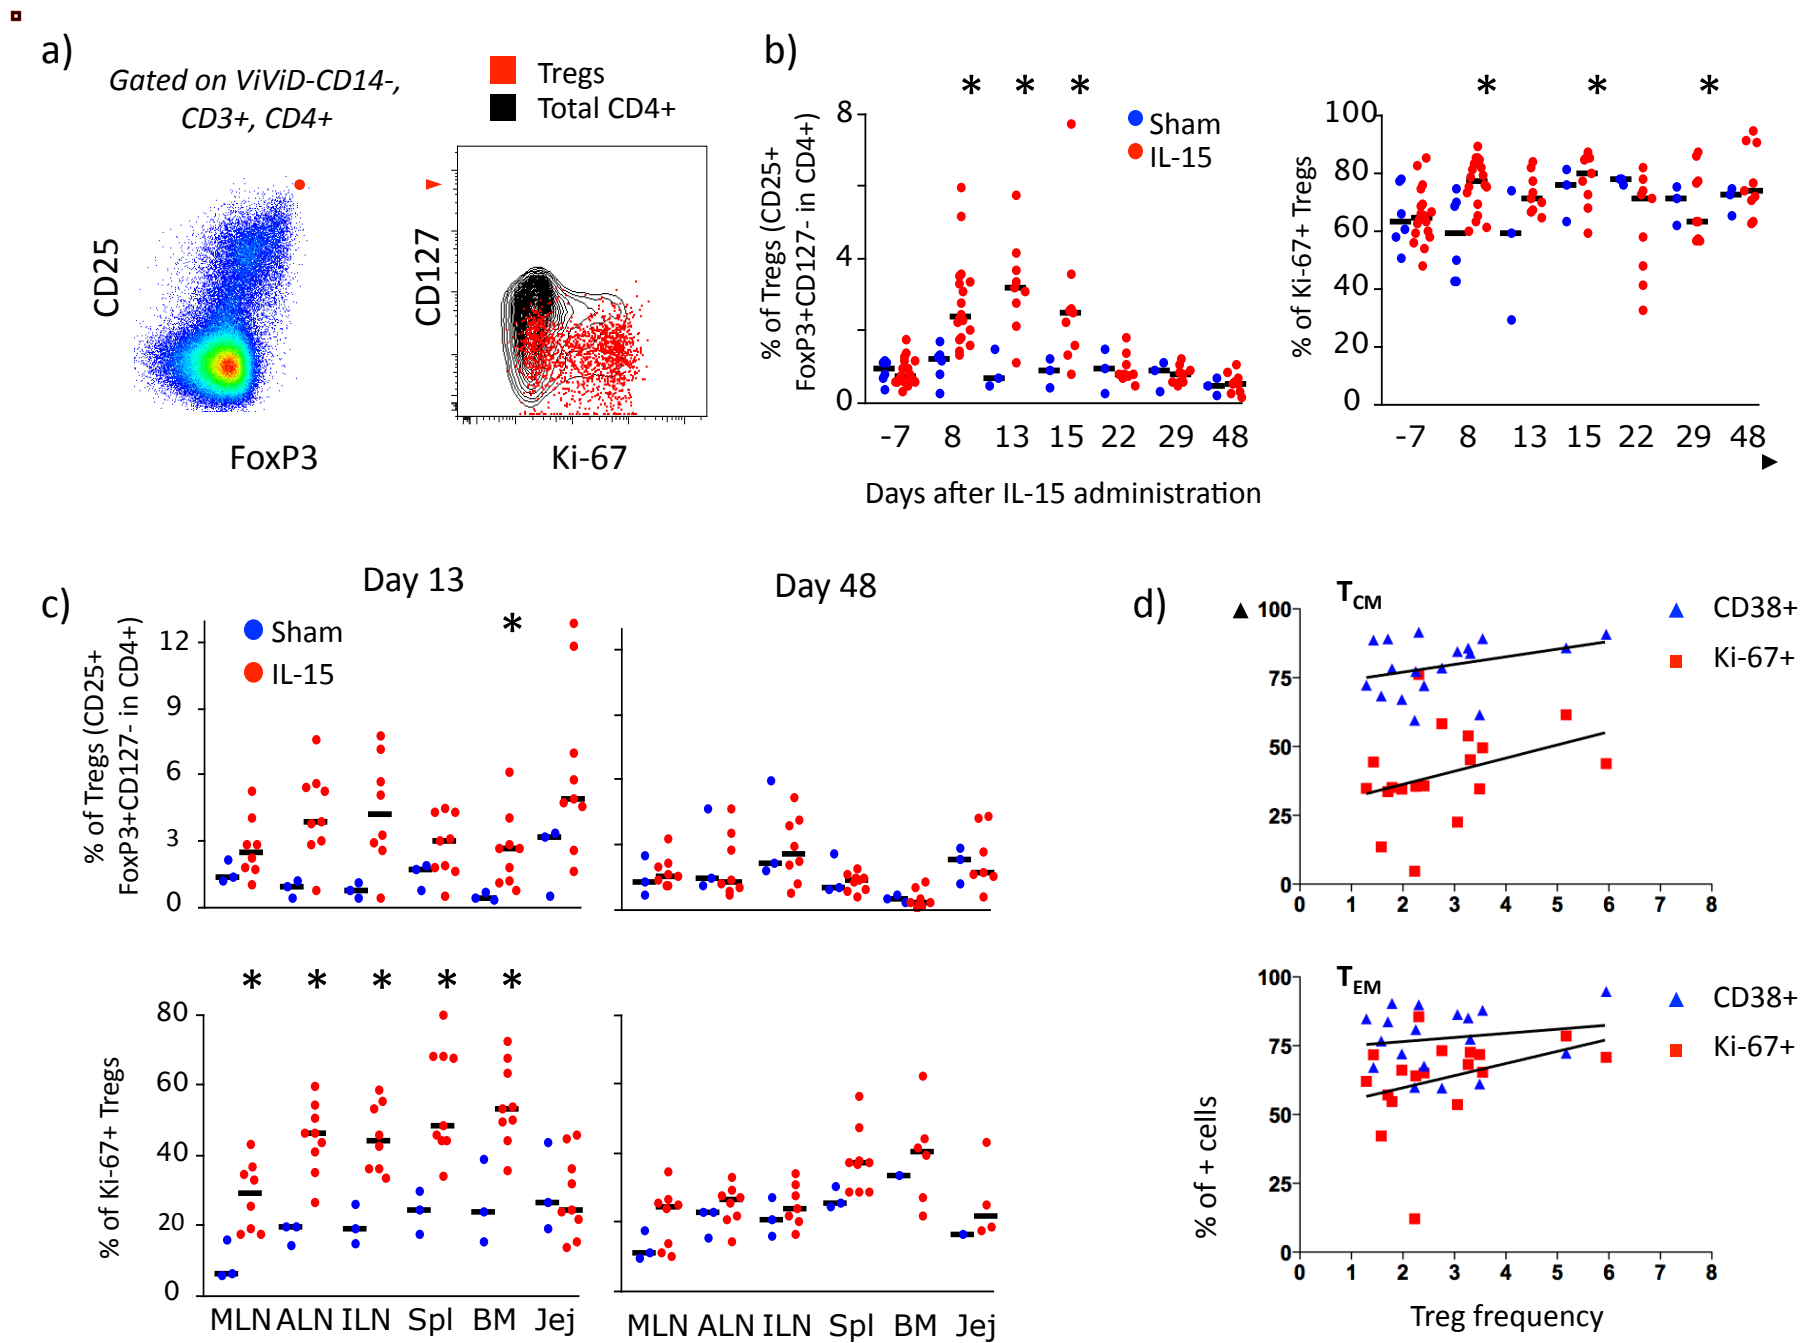

Figure S3

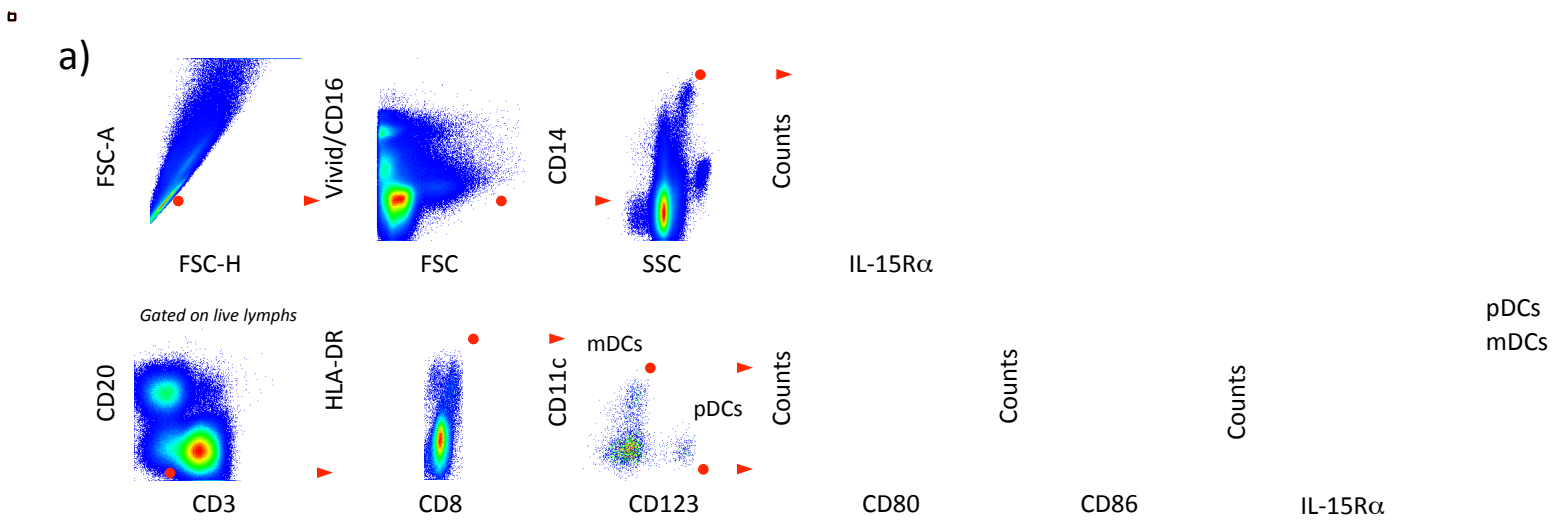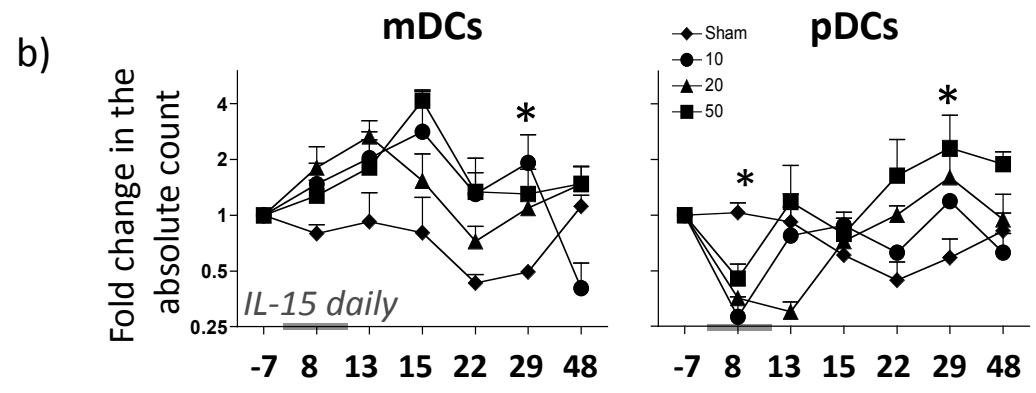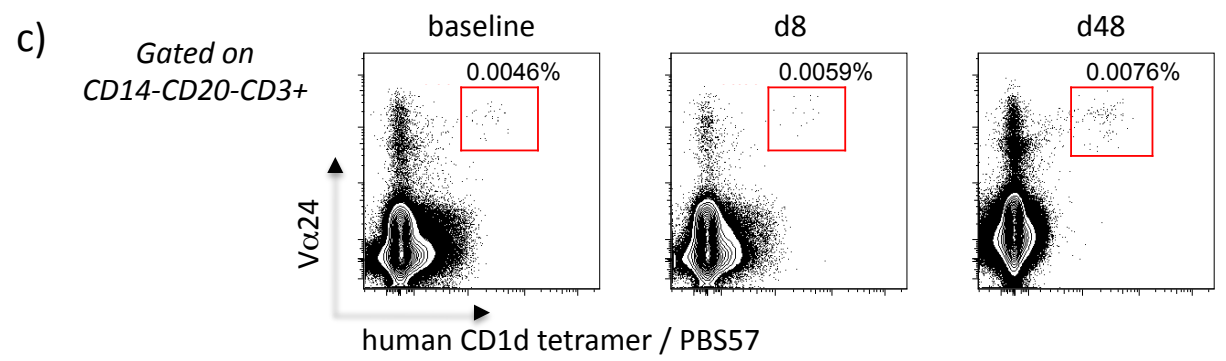

Figure S4

□

● Sham  
● IL-15

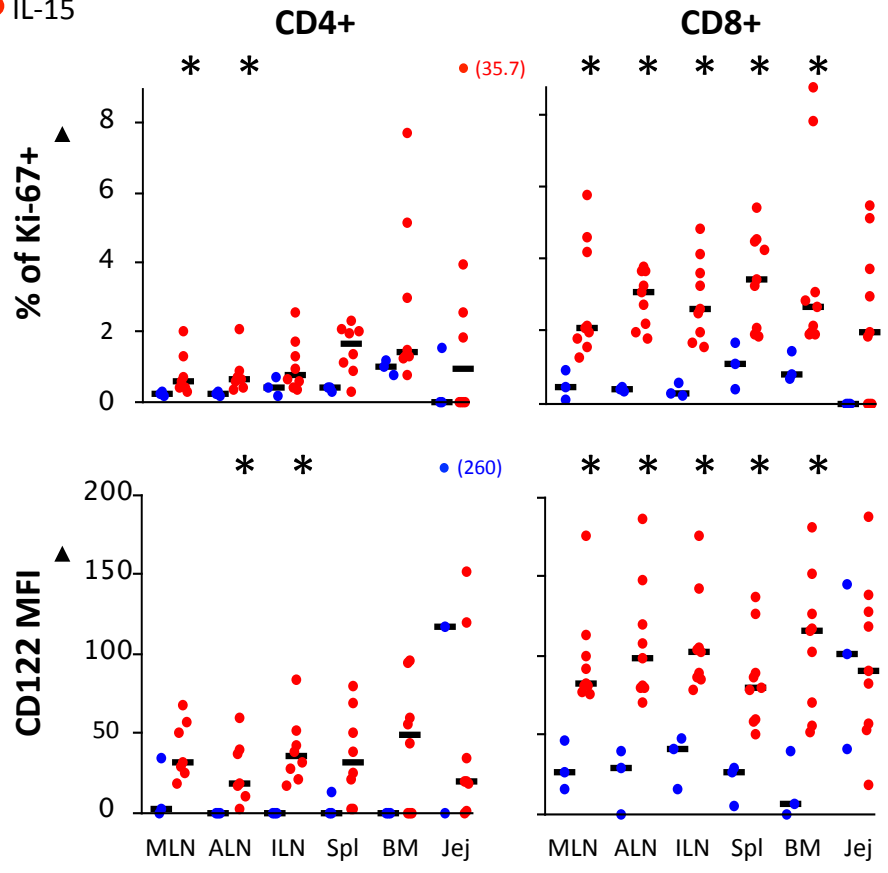

Figure S5



□

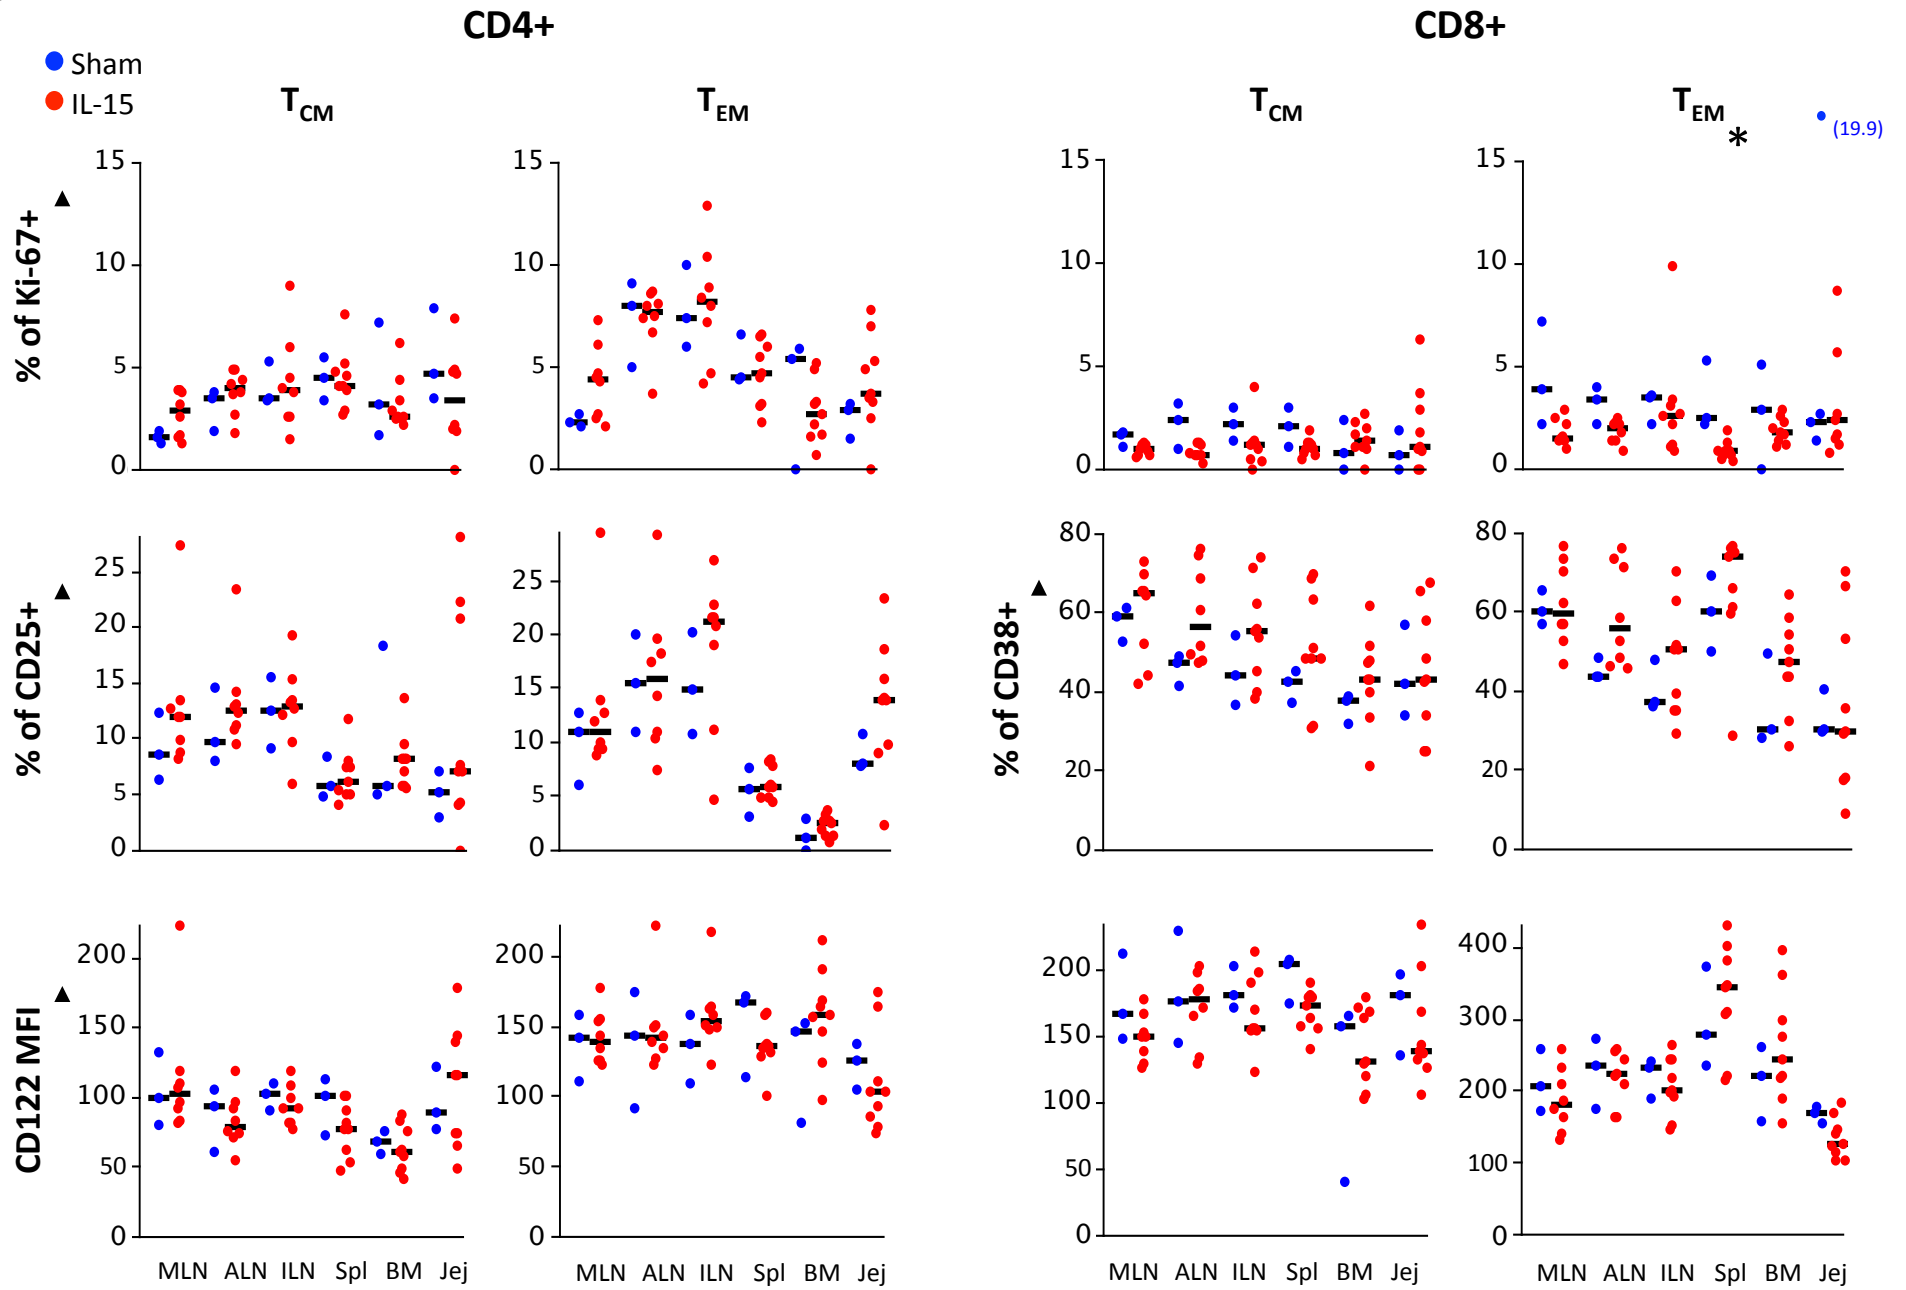

Figure S6

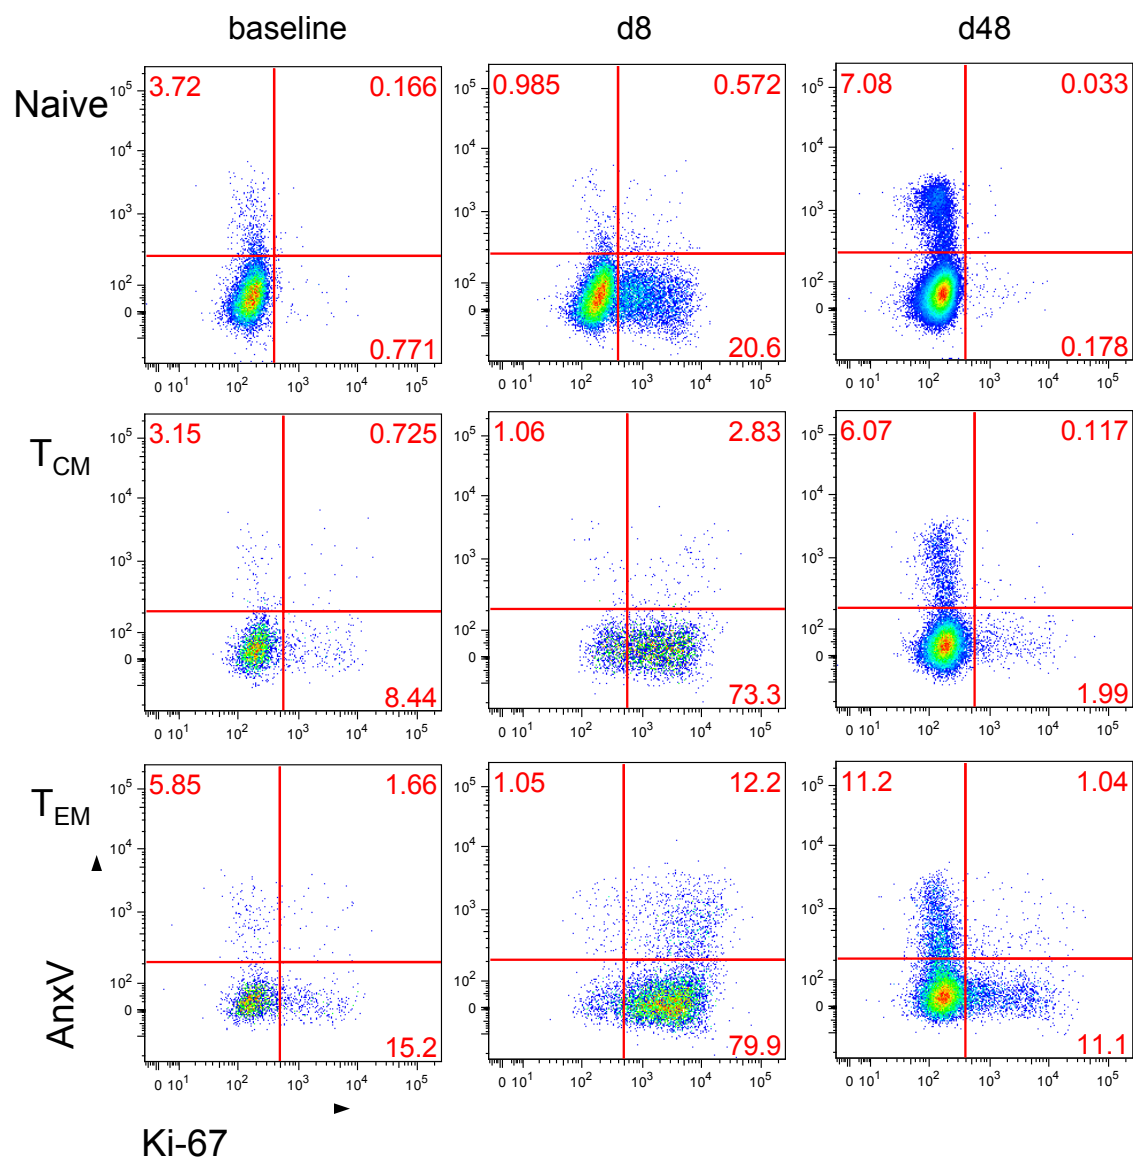

Figure S7
